# Supplementary material for: Forcing For Varying Boundary Layer Stability Across Antarctica
Source: Copernicus journal article supplement (doi:10.5194/egusphere-2023-2062), 2023-10-04
Supplement: Supplementary file 1 [file egusphere-2023-2062-supplement.pdf]

1 **Supplemental Information**

2  
3  
4  
5  
6  
7

*Table S1: Number of BMUs, mean downwelling longwave radiation ( $W m^{-2}$ ) and mean 20 m wind speed ( $m s^{-1}$ ) (from left to right, separated by a forward slash (/) in each column) for each regime annually and seasonally at South Pole. Rows that list the basic near-surface stability regimes are shown with gray shading. Regimes with less than 10 observations annually or seasonally are listed in italics and red text. A triple dash (“---”) indicates this regime is not observed annually or seasonally.*

| South Pole      |                  |                      |                      |                       |                       |
|-----------------|------------------|----------------------|----------------------|-----------------------|-----------------------|
| Regime          | Annual           | Summer               | Fall                 | Winter                | Spring                |
| <b>NN</b>       | 66 / 174 / 4.5   | 64 / 173 / 4.5       | <i>1 / 204 / 2.4</i> | ---                   | <i>1 / 200 / 3.6</i>  |
| <b>NN-WSA</b>   | 85 / 172 / 5.5   | 78 / 171 / 5.4       | <i>3 / 184 / 4.2</i> | ---                   | <i>4 / 176 / 8.8</i>  |
| <b>NN-MSA</b>   | 177 / 160 / 6.2  | 150 / 159 / 5.8      | <i>3 / 159 / 9.4</i> | <i>1 / --- / 9.8</i>  | 23 / 164 / 8.6        |
| <b>NN-SSA</b>   | 275 / 156 / 7.2  | 122 / 158 / 5.1      | 22 / 167 / 8.3       | 42 / 144 / 9.5        | 89 / 155 / 8.9        |
| <b>VSM-WSA</b>  | 100 / 163 / 4.3  | 99 / 163 / 4.3       | ---                  | ---                   | <i>1 / --- / 10.2</i> |
| <b>VSM-MSA</b>  | 388 / 144 / 4.5  | 362 / 145 / 4.4      | <i>5 / 186 / 4.2</i> | ---                   | 21 / 130 / 6.5        |
| <b>VSM-SSA</b>  | 955 / 136 / 6.5  | 262 / 147 / 5.0      | 194 / 142 / 6.2      | 194 / 125 / 7.8       | 305 / 130 / 7.2       |
| <b>WS</b>       | 23 / 144 / 6.2   | 17 / 133 / 5.7       | <i>1 / 168 / 2.6</i> | <i>1 / 106 / 10.2</i> | <i>4 / 187 / 8.3</i>  |
| <b>WS-MSA</b>   | 62 / 140 / 7.7   | 36 / 133 / 6.7       | <i>5 / 146 / 8.7</i> | <i>5 / 154 / 11.0</i> | 16 / 145 / 8.8        |
| <b>WS-SSA</b>   | 208 / 138 / 9.3  | 32 / 136 / 6.6       | 29 / 128 / 9.5       | 70 / 142 / 9.7        | 77 / 137 / 10.0       |
| <b>MS</b>       | 363 / 135 / 4.4  | 278 / 137 / 3.9      | 17 / 138 / 6.0       | <i>3 / 123 / 9.6</i>  | 65 / 129 / 5.8        |
| <b>MS-SSA</b>   | 751 / 125 / 6.2  | 235 / 131 / 4.8      | 171 / 132 / 6.2      | 67 / 125 / 8.7        | 278 / 117 / 6.8       |
| <b>MS-VSSA</b>  | 517 / 112 / 8.0  | <i>1 / 126 / 5.4</i> | 152 / 121 / 7.3      | 177 / 108 / 8.5       | 187 / 108 / 8.1       |
| <b>MS-ESSA</b>  | 236 / 98 / 8.5   | ---                  | 49 / 104 / 7.5       | 128 / 98 / 8.9        | 59 / 96 / 8.6         |
| <b>SS</b>       | 1157 / 117 / 5.1 | 192 / 128 / 3.7      | 419 / 119 / 5.2      | 126 / 115 / 7.1       | 420 / 110 / 5.1       |
| <b>SS-VSSA</b>  | 1032 / 101 / 6.8 | <i>1 / --- / 3.8</i> | 322 / 107 / 6.2      | 377 / 97 / 7.3        | 332 / 101 / 6.9       |
| <b>SS-ESSA</b>  | 409 / 92 / 7.5   | ---                  | 96 / 96 / 7.0        | 230 / 89 / 7.7        | 83 / 94 / 7.7         |
| <b>VSS</b>      | 1076 / 98 / 5.4  | <i>6 / 129 / 5.5</i> | 354 / 104 / 4.7      | 398 / 90 / 6.1        | 318 / 100 / 5.2       |
| <b>VSS-ESSA</b> | 274 / 92 / 6.5   | ---                  | 68 / 95 / 6.1        | 151 / 90 / 6.6        | 55 / 95 / 6.5         |
| <b>ESS</b>      | 433 / 91 / 5.2   | ---                  | 104 / 95 / 4.9       | 241 / 88 / 5.3        | 88 / 93 / 5.0         |

8 *Table S2: Number of BMUs, mean downwelling longwave radiation ( $W m^{-2}$ ) and mean 20 m wind speed*  
9 *( $m s^{-1}$ ) (from left to right, separated by a forward slash (/) in each column) for each regime annually and*  
10 *seasonally at Dome C. Rows that list the basic near-surface stability regimes are shown with gray*  
11 *shading. Regimes with less than 10 observations annually or seasonally are listed in italics and red text. A*  
12 *triple dash (“---”) indicates this regime is not observed annually or seasonally.*

| Dome C          |                      |                      |                      |                       |                       |
|-----------------|----------------------|----------------------|----------------------|-----------------------|-----------------------|
| Regime          | Annual               | Summer               | Fall                 | Winter                | Spring                |
| <b>NN</b>       | <i>9 / 140 / 4.3</i> | <i>9 / 140 / 4.3</i> | ---                  | ---                   | ---                   |
| <b>NN-WSA</b>   | 21 / 146 / 3.5       | 21 / 146 / 3.5       | ---                  | ---                   | ---                   |
| <b>NN-MSA</b>   | 33 / 141 / 4.7       | 33 / 141 / 4.7       | ---                  | ---                   | ---                   |
| <b>NN-SSA</b>   | 24 / 152 / 5.3       | 21 / 152 / 4.9       | <i>2 / 162 / 7.3</i> | <i>1 / --- / 10.2</i> | ---                   |
| <b>VSM-WSA</b>  | 82 / 123 / 3.3       | 81 / 123 / 3.2       | <i>1 / --- / 4.4</i> | ---                   | ---                   |
| <b>VSM-MSA</b>  | 267 / 119 / 3.4      | 219 / 123 / 3.4      | 23 / 109 / 3.6       | <i>3 / 84 / 4.0</i>   | 22 / 95 / 3.1         |
| <b>VSM-SSA</b>  | 102 / 126 / 5.3      | 46 / 131 / 3.3       | 28 / 112 / 6.5       | <i>4 / 178 / 15.8</i> | 24 / 123 / 6.2        |
| <b>WS</b>       | 52 / 127 / 4.5       | 50 / 127 / 4.3       | ---                  | ---                   | <i>2 / 134 / 8.8</i>  |
| <b>WS-MSA</b>   | 78 / 130 / 5.9       | 68 / 128 / 5.5       | <i>3 / 135 / 7.2</i> | <i>1 / --- / 12.7</i> | <i>6 / 142 / 8.8</i>  |
| <b>WS-SSA</b>   | 23 / 125 / 7.3       | 13 / 132 / 4.8       | <i>3 / 98 / 10.2</i> | <i>4 / 118 / 12.1</i> | <i>3 / 123 / 8.7</i>  |
| <b>MS</b>       | 364 / 118 / 5.5      | 246 / 122 / 5.3      | 44 / 116 / 5.3       | 12 / 132 / 9.0        | 62 / 104 / 5.8        |
| <b>MS-SSA</b>   | 241 / 114 / 6.6      | 38 / 123 / 5.8       | 86 / 115 / 6.0       | 12 / 130 / 8.4        | 105 / 110 / 7.3       |
| <b>MS-VSSA</b>  | 53 / 105 / 9.8       | ---                  | 20 / 113 / 8.0       | 15 / 101 / 11.7       | 18 / 100 / 10.2       |
| <b>MS-ESSA</b>  | <i>8 / 99 / 12.0</i> | ---                  | <i>2 / 84 / 10.3</i> | <i>5 / 111 / 12.8</i> | <i>1 / 106 / 11.1</i> |
| <b>SS</b>       | 1450 / 97 / 5.1      | 53 / 120 / 4.8       | 473 / 102 / 4.8      | 545 / 90 / 5.1        | 379 / 96 / 5.5        |
| <b>SS-VSSA</b>  | 223 / 94 / 8.2       | <i>4 / 132 / 7.0</i> | 69 / 93 / 7.5        | 58 / 99 / 9.5         | 92 / 91 / 7.9         |
| <b>SS-ESSA</b>  | 90 / 80 / 10.1       | ---                  | 20 / 78 / 8.6        | 43 / 83 / 11.2        | 27 / 78 / 9.5         |
| <b>VSS</b>      | 997 / 88 / 6.2       | 11 / 124 / 4.6       | 284 / 94 / 5.9       | 454 / 83 / 6.2        | 248 / 89 / 6.5        |
| <b>VSS-ESSA</b> | 120 / 82 / 8.8       | ---                  | 29 / 84 / 8.0        | 64 / 82 / 9.8         | 27 / 81 / 7.4         |
| <b>ESS</b>      | 910 / 79 / 7.7       | <i>1 / 156 / 5.5</i> | 219 / 83 / 7.3       | 522 / 76 / 8.0        | 168 / 81 / 7.3        |

13 *Table S3: Number of BMUs, mean downwelling longwave radiation ( $W m^{-2}$ ) and mean 20 m wind speed*  
 14 *( $m s^{-1}$ ) (from left to right, separated by a forward slash (/) in each column) for each regime annually and*  
 15 *seasonally at McMurdo. Rows that list the basic near-surface stability regimes are shown with gray*  
 16 *shading. Regimes with less than 10 observations annually or seasonally are listed in italics and red text. A*  
 17 *triple dash (“---”) indicates this regime is not observed annually or seasonally.*

| McMurdo         |                      |                       |                       |                       |                      |
|-----------------|----------------------|-----------------------|-----------------------|-----------------------|----------------------|
| Regime          | Annual               | Summer                | Fall                  | Winter                | Spring               |
| <b>NN</b>       | 28 / 232 / 5.2       | 15 / 244 / 5.4        | <i>6 / 222 / 3.1</i>  | <i>1 / 243 / 11.7</i> | <i>6 / 212 / 5.8</i> |
| <b>NN-WSA</b>   | 70 / 220 / 4.8       | 30 / 238 / 5.0        | 18 / 210 / 3.9        | <i>7 / 211 / 6.9</i>  | 15 / 204 / 4.5       |
| <b>NN-MSA</b>   | 72 / 208 / 5.6       | 31 / 236 / 5.0        | 13 / 200 / 6.5        | 12 / 184 / 6.9        | 16 / 188 / 4.9       |
| <b>NN-SSA</b>   | 43 / 187 / 6.4       | <i>9 / 229 / 7.8</i>  | <i>8 / 192 / 9.7</i>  | 14 / 157 / 5.8        | 12 / 188 / 3.9       |
| <b>VSM-WSA</b>  | 75 / 205 / 2.8       | 35 / 227 / 2.4        | 20 / 191 / 3.0        | <i>7 / 165 / 3.2</i>  | 13 / 200 / 3.1       |
| <b>VSM-MSA</b>  | 148 / 188 / 4.3      | 43 / 223 / 4.0        | 37 / 187 / 4.6        | 35 / 161 / 4.4        | 33 / 184 / 4.1       |
| <b>VSM-SSA</b>  | 103 / 181 / 5.1      | 12 / 224 / 5.2        | 30 / 189 / 7.1        | 34 / 168 / 4.3        | 27 / 172 / 4.0       |
| <b>WS</b>       | 10 / 197 / 5.3       | <i>1 / 276 / 5.4</i>  | <i>1 / 250 / 16.0</i> | <i>5 / 181 / 4.5</i>  | <i>3 / 179 / 3.1</i> |
| <b>WS-MSA</b>   | 11 / 205 / 6.8       | <i>1 / 266 / 10.4</i> | <i>2 / 209 / 8.0</i>  | <i>6 / 200 / 6.7</i>  | <i>2 / 189 / 4.0</i> |
| <b>WS-SSA</b>   | <i>9 / 144 / 7.0</i> | ---                   | <i>2 / 123 / 9.3</i>  | <i>4 / 147 / 6.0</i>  | <i>3 / 155 / 6.8</i> |
| <b>MS</b>       | 85 / 173 / 2.5       | 10 / 235 / 2.3        | 16 / 190 / 2.8        | 36 / 148 / 1.9        | 23 / 172 / 3.3       |
| <b>MS-SSA</b>   | 44 / 165 / 3.3       | <i>3 / 255 / 3.9</i>  | <i>8 / 176 / 4.9</i>  | 25 / 157 / 2.6        | <i>8 / 158 / 3.4</i> |
| <b>MS-VSSA</b>  | <i>4 / 158 / 5.5</i> | <i>1 / 198 / 7.6</i>  | ---                   | <i>3 / 144 / 4.9</i>  | ---                  |
| <b>MS-ESSA</b>  | ---                  | ---                   | ---                   | ---                   | ---                  |
| <b>SS</b>       | 67 / 161 / 3.0       | <i>1 / 227 / 3.6</i>  | 18 / 175 / 5.3        | 31 / 149 / 2.0        | 17 / 164 / 2.4       |
| <b>SS-VSSA</b>  | <i>7 / 147 / 3.8</i> | ---                   | <i>1 / 212 / 7.7</i>  | <i>6 / 136 / 3.1</i>  | ---                  |
| <b>SS-ESSA</b>  | <i>1 / 139 / 0.2</i> | ---                   | ---                   | <i>1 / 139 / 0.2</i>  | ---                  |
| <b>VSS</b>      | <i>9 / 139 / 2.4</i> | ---                   | ---                   | <i>6 / 145 / 1.7</i>  | <i>3 / 128 / 3.7</i> |
| <b>VSS-ESSA</b> | ---                  | ---                   | ---                   | ---                   | ---                  |
| <b>ESS</b>      | ---                  | ---                   | ---                   | ---                   | ---                  |

18 *Table S4: Number of BMUs, mean downwelling longwave radiation ( $W m^{-2}$ ) and mean 20 m wind speed*  
 19 *( $m s^{-1}$ ) (from left to right, separated by a forward slash (/) in each column) for each regime annually and*  
 20 *seasonally at Neumayer. Rows that list the basic near-surface stability regimes are shown with gray*  
 21 *shading. Regimes with less than 10 observations annually or seasonally are listed in italics and red text. A*  
 22 *triple dash (“---”) indicates this regime is not observed annually or seasonally.*

| Neumayer        |                       |                       |                       |                       |                      |
|-----------------|-----------------------|-----------------------|-----------------------|-----------------------|----------------------|
| Regime          | Annual                | Summer                | Fall                  | Winter                | Spring               |
| <b>NN</b>       | 53 / 261 / 8.9        | 28 / 263 / 7.4        | <i>2 / 261 / 6.0</i>  | <i>4 / 235 / 9.4</i>  | 19 / 264 / 11.3      |
| <b>NN-WSA</b>   | 147 / 263 / 11.1      | 82 / 271 / 10.9       | 17 / 260 / 10.0       | 15 / 227 / 10.5       | 33 / 261 / 12.8      |
| <b>NN-MSA</b>   | 136 / 248 / 12.6      | 43 / 257 / 10.0       | 26 / 247 / 12.6       | 18 / 227 / 13.9       | 49 / 247 / 14.5      |
| <b>NN-SSA</b>   | 38 / 232 / 14.0       | <i>4 / 270 / 11.5</i> | <i>9 / 245 / 15.2</i> | 13 / 223 / 15.7       | 12 / 222 / 12.3      |
| <b>VSM-WSA</b>  | 93 / 245 / 4.3        | 57 / 254 / 4.2        | 18 / 246 / 2.8        | <i>7 / 205 / 6.9</i>  | 11 / 219 / 5.8       |
| <b>VSM-MSA</b>  | 115 / 227 / 6.7       | 32 / 241 / 5.3        | 25 / 239 / 6.4        | 22 / 207 / 7.9        | 36 / 218 / 7.5       |
| <b>VSM-SSA</b>  | 62 / 213 / 7.8        | 19 / 220 / 4.4        | <i>9 / 230 / 9.3</i>  | 15 / 208 / 9.1        | 19 / 200 / 9.7       |
| <b>WS</b>       | 43 / 224 / 7.9        | 10 / 255 / 8.7        | <i>7 / 213 / 6.2</i>  | 10 / 204 / 7.3        | 16 / 223 / 8.5       |
| <b>WS-MSA</b>   | 46 / 223 / 9.6        | 10 / 236 / 8.8        | <i>7 / 243 / 10.2</i> | 23 / 215 / 9.8        | <i>6 / 206 / 9.4</i> |
| <b>WS-SSA</b>   | 14 / 223 / 11.4       | <i>2 / 266 / 9.6</i>  | <i>3 / 256 / 15.4</i> | <i>8 / 198 / 10.7</i> | <i>1 / 240 / 7.9</i> |
| <b>MS</b>       | 179 / 201 / 5.2       | 43 / 231 / 4.3        | 38 / 219 / 4.9        | 56 / 169 / 6.2        | 42 / 195 / 5.2       |
| <b>MS-SSA</b>   | 72 / 181 / 5.7        | <i>7 / 221 / 4.4</i>  | 14 / 203 / 4.7        | 35 / 169 / 6.2        | 16 / 172 / 6.1       |
| <b>MS-VSSA</b>  | ---                   | ---                   | ---                   | ---                   | ---                  |
| <b>MS-ESSA</b>  | ---                   | ---                   | ---                   | ---                   | ---                  |
| <b>SS</b>       | 199 / 179 / 5.0       | 21 / 222 / 5.3        | 41 / 203 / 3.7        | 99 / 160 / 5.2        | 38 / 180 / 5.4       |
| <b>SS-VSSA</b>  | <i>3 / 183 / 5.7</i>  | ---                   | ---                   | <i>3 / 183 / 5.7</i>  | ---                  |
| <b>SS-ESSA</b>  | ---                   | ---                   | ---                   | ---                   | ---                  |
| <b>VSS</b>      | 19 / 162 / 6.0        | ---                   | <i>6 / 182 / 4.7</i>  | 10 / 159 / 6.7        | <i>3 / 132 / 6.2</i> |
| <b>VSS-ESSA</b> | ---                   | ---                   | ---                   | ---                   | ---                  |
| <b>ESS</b>      | <i>1 / 150 / 11.5</i> | ---                   | ---                   | <i>1 / 150 / 11.5</i> | ---                  |

23 *Table S5: Nu Number of BMUs, mean downwelling longwave radiation ( $W m^{-2}$ ) and mean 20 m wind*  
 24 *speed ( $m s^{-1}$ ) (from left to right, separated by a forward slash (/) in each column) for each regime*  
 25 *annually and seasonally at Syowa. Rows that list the basic near-surface stability regimes are shown with*  
 26 *gray shading. Regimes with less than 10 observations annually or seasonally are listed in italics and red*  
 27 *text. A triple dash (“---”) indicates this regime is not observed annually or seasonally.*

| Syowa           |                      |                      |                      |                      |                      |
|-----------------|----------------------|----------------------|----------------------|----------------------|----------------------|
| Regime          | Annual               | Summer               | Fall                 | Winter               | Spring               |
| <b>NN</b>       | 152 / 236 / 7.2      | 39 / 245 / 5.3       | 38 / 245 / 7.2       | 32 / 236 / 11.6      | 43 / 220 / 5.5       |
| <b>NN-WSA</b>   | 891 / 234 / 6.2      | 270 / 239 / 5.2      | 253 / 247 / 6.4      | 109 / 227 / 8.8      | 259 / 219 / 6.1      |
| <b>NN-MSA</b>   | 317 / 220 / 5.7      | 78 / 223 / 4.0       | 83 / 238 / 7.2       | 68 / 210 / 6.3       | 88 / 208 / 5.4       |
| <b>NN-SSA</b>   | 24 / 214 / 4.1       | <i>7 / 243 / 4.9</i> | <i>5 / 188 / 3.7</i> | <i>5 / 221 / 3.9</i> | <i>7 / 195 / 3.8</i> |
| <b>VSM-WSA</b>  | 1015 / 226 / 5.4     | 270 / 239 / 4.6      | 291 / 239 / 5.8      | 194 / 208 / 6.3      | 260 / 212 / 5.2      |
| <b>VSM-MSA</b>  | 883 / 205 / 5.1      | 157 / 226 / 4.7      | 224 / 228 / 5.5      | 309 / 182 / 4.8      | 193 / 196 / 5.3      |
| <b>VSM-SSA</b>  | 110 / 196 / 5.2      | 15 / 245 / 3.2       | 18 / 213 / 6.8       | 50 / 180 / 5.1       | 27 / 187 / 5.3       |
| <b>WS</b>       | 730 / 234 / 9.7      | 118 / 253 / 8.3      | 200 / 248 / 9.7      | 239 / 222 / 10.5     | 173 / 222 / 9.5      |
| <b>WS-MSA</b>   | 216 / 204 / 6.7      | 15 / 240 / 6.9       | 62 / 225 / 8.1       | 94 / 186 / 6.4       | 45 / 202 / 5.4       |
| <b>WS-SSA</b>   | 18 / 191 / 6.5       | ---                  | <i>4 / 213 / 5.1</i> | <i>6 / 179 / 8.2</i> | <i>8 / 190 / 5.9</i> |
| <b>MS</b>       | 1460 / 192 / 6.5     | 172 / 227 / 6.9      | 295 / 214 / 7.4      | 640 / 178 / 6.4      | 353 / 184 / 6.2      |
| <b>MS-SSA</b>   | 133 / 182 / 4.6      | <i>7 / 218 / 5.1</i> | 25 / 207 / 5.4       | 62 / 171 / 4.1       | 39 / 178 / 4.7       |
| <b>MS-VSSA</b>  | <i>3 / 154 / 1.1</i> | ---                  | ---                  | <i>2 / --- / 1.2</i> | <i>1 / 165 / 1.0</i> |
| <b>MS-ESSA</b>  | ---                  | ---                  | ---                  | ---                  | ---                  |
| <b>SS</b>       | 404 / 176 / 5.4      | 21 / 223 / 8.3       | 64 / 199 / 5.5       | 232 / 168 / 5.1      | 87 / 169 / 5.5       |
| <b>SS-VSSA</b>  | <i>7 / 167 / 2.2</i> | ---                  | <i>1 / 196 / 2.1</i> | <i>5 / 156 / 1.5</i> | <i>1 / 193 / 5.6</i> |
| <b>SS-ESSA</b>  | ---                  | ---                  | ---                  | ---                  | ---                  |
| <b>VSS</b>      | 26 / 154 / 4.4       | ---                  | <i>3 / 183 / 8.1</i> | 14 / 150 / 4.4       | <i>9 / 150 / 3.1</i> |
| <b>VSS-ESSA</b> | ---                  | ---                  | ---                  | ---                  | ---                  |
| <b>ESS</b>      | <i>1 / 156 / 7.2</i> | ---                  | ---                  | <i>1 / 156 / 7.2</i> | ---                  |
